# Supplementary material for: The Humoral Immune Response of the ChAdOx1 nCoV-19 Vaccine in Maintenance Dialysis Patients without Prior COVID-19 Infection
Source: MDPI journal article supplement (doi:10.3390/vaccines10020338), 2022-02-21
Supplement: s1 [file s1]

## Supplementary data

**Table S1 Clinical characteristics of chronic dialysis patients, HD vs. PD**

|                                | HD(N=269)   | PD(N=39)      | P value     |
|--------------------------------|-------------|---------------|-------------|
| Age±SD (years)                 | 66.2±12.37  | 60.9±11.61    | 0.019*      |
| Sex (Male/Female)              | 168/101     | 21/18         | 0.304       |
| Body weight (kg)               | 63.7±13.71  | 65.6±11.88    | 0.301       |
| BMI (kg/m <sup>2</sup> )       | 24.0±4.14   | 25.1±3.78     | 0.067       |
| Kt/V (HD/PD)                   | 1.60±0.29   | 2.07±0.24     |             |
| URR/WCC (HD/PD)                | 72.9±5.32   | 61.1±16.39    |             |
| Albumin (g/dL)                 | 3.88±0.38   | 3.57±0.31     | 0.0001***   |
| Dialysis vintage (Months)      | 76.5±70.89  | 56.2±52.19    | 0.097       |
| Ferritin (ng/mL)               | 437.8±348.9 | 412.7±523.0   | 0.106       |
| WBC (x10 <sup>3</sup> /μl)     | 6.29±1.94   | 7.16±1.99     | 0.014*      |
| Hemoglobin (g/dL)              | 10.3±1.06   | 10.3±1.97     | 0.414       |
| Platelet (10 <sup>3</sup> /μL) | 172.2±59.1  | 221.9±101.7   | 0.0002***   |
| Sodium (mmol/l)                | 137.0±8.7   | 133.9±4.1     | <0.0001**** |
| Potassium (mmol/l)             | 4.6±0.73    | 4.0±0.67      | <0.0001**** |
| Calcium (mg/dl)                | 9.1±0.8     | 9.2±0.8       | 0.219       |
| Phosphate (mg/dl)              | 5.0±1.4     | 5.1±1.7       | 0.730       |
| Intact PTH (pg/ml)             | 401.5±404.3 | 464.4±375.3   | 0.064       |
| Triglyceride (mg/dl)           | 176.3±133.6 | 171.2±119.2   | 0.834       |
| Cholesterol (mg/dl)            | 149.9±39.6  | 161.1±49.4    | 0.288       |
| GOT (U/l)                      | 15.5±9.1    | 17.7±8.2      | 0.041*      |
| GPT (U/l)                      | 13.5±9.3    | 20.1±10.5     | <0.0001**** |
| Total Bilirubin (mg/dl)        | 0.45±0.19   | 0.47±0.16     | 0.469       |
| Direct bilirubin (mg/dl)       | 0.11±0.10   | 0.11±0.05     | 0.550       |
| DM                             | 136         | 16            | 0.268       |
| Hypertension                   | 210         | 37            | 0.026*      |
| Anti-RBD Ab (AU/ml): T3        | 1342±1894.0 | 2236.0±4592.0 | 0.394       |
| T2                             | 274.7±637.2 | 209.2±323.5   | 0.589       |
| T1                             | 132.1±395.1 | 39.78±54.28   | 0.086       |
| T0                             | 3.9±4.3     | 7.0±9.6       | 0.015*      |

Abbreviations: BMI, body mass index; DM, diabetes mellitus; GOT, glutamic oxaloacetic transaminase; GPT, glutamic pyruvic transaminase; HD, hemodialysis; intact PTH, intact parathyroid hormone; Kt/V, quantifying hemodialysis and peritoneal dialysis treatment adequacy, K, dialyzer clearance of urea; t, dialysis time; V, the volume of distribution of urea. PD, peritoneal dialysis; URR, urea reduction ratio; WBC, white cell counts; WCC, weekly creatinine clearance.

**Figure S1**

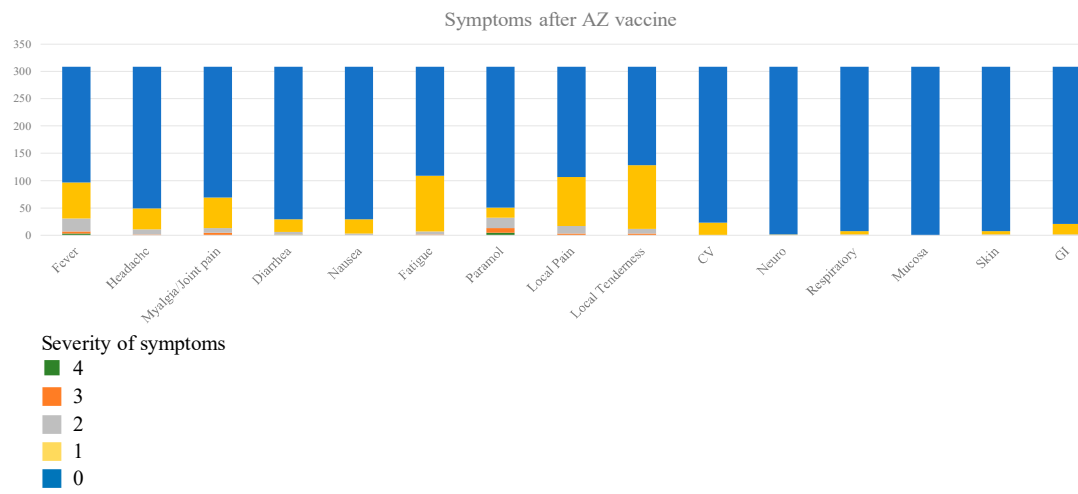

Figure S1. Symptoms of the participants after the first dose of ChAdOx1 nCoV-19 vaccine. Different color represents different severity of symptoms.
